# Supplementary material for: Backward Gait is Associated with Motor Symptoms and Fear of Falling in Patients with De Novo Parkinson's Disease
Source: PubMed Central journal article supplement — J Clin Neurol. 2019 Aug 23;15(4):473–9. doi: 10.3988/jcn.2019.15.4.473 (PMC6785475; doi:10.3988/jcn.2019.15.4.473), 2019-08-23
Supplement: jcn-15-473-s001.pdf [file jcn-15-473-s001.pdf]

**Supplementary Table 1.** Spatiotemporal parameters of three gait tasks in healthy controls

|                         | Healthy controls |              |              | F      | p       | FG vs. BG | FG vs. DG | BG vs. DG |
|-------------------------|------------------|--------------|--------------|--------|---------|-----------|-----------|-----------|
|                         | FG               | BG           | DG           |        |         | p         | p         | p         |
| Walking speed, cm/s     | 116.50±9.92      | 83.50±13.54  | 99.43±12.54  | 50.389 | <0.001* | <0.001*   | <0.001*   | <0.001*   |
| Cadence, steps/min      | 111.93±9.08      | 110.60±11.19 | 103.17±10.12 | 5.825  | 0.004*  | 0.502     | <0.001*   | 0.001*    |
| Stride time, s          | 1.08±0.09        | 1.09±0.12    | 1.17±0.13    | 5.551  | 0.006*  | 0.354     | <0.001*   | 0.004*    |
| Stride length, cm       | 125.62±8.75      | 90.87±11.09  | 114.81±10.51 | 82.636 | <0.001* | <0.001*   | <0.001*   | <0.001*   |
| Swing phase, %          | 38.67±0.87       | 35.79±1.81   | 37.52±1.66   | 25.083 | <0.001* | <0.001*   | <0.001*   | <0.001*   |
| Double-support phase, % | 22.97±1.69       | 28.07±3.19   | 25.34±2.85   | 25.641 | <0.001* | <0.001*   | <0.001*   | <0.001*   |
| Step width, cm          | 8.24±2.44        | 16.17±4.22   | 8.56±2.99    | 49.934 | <0.001* | <0.001*   | 0.190     | <0.001*   |
| CV, %                   |                  |              |              |        |         |           |           |           |
| Stride time             | 2.86±0.95        | 4.71±1.82    | 5.29±2.97    | 9.968  | <0.001* | <0.001*   | <0.001*   | 0.272     |
| Stride length           | 3.40±1.05        | 7.32±2.74    | 4.92±1.79    | 26.774 | <0.001* | <0.001*   | 0.001*    | <0.001*   |
| Asymmetry of gait       |                  |              |              |        |         |           |           |           |
| Gait asymmetry index    | 2.37±1.60        | 3.26±3.30    | 2.81±2.03    | 1.889  | 0.158   | 0.054     | 0.061     | 0.657     |
| Gait CV asymmetry       | 21.01±13.40      | 17.76±17.60  | 25.82±16.52  | 3.902  | 0.024*  | 0.017*    | 0.330     | 0.067     |

Data are mean±SD values. ANOVA was used for comparisons of the three gait tasks, and the paired t-test was used for comparisons of two gait tasks in controls.

\*p<0.05.

BG: backward gait, CV: coefficient of variation, DG: dual-task gait, FG: forward gait.
