# Supplementary material for: Backward Gait is Associated with Motor Symptoms and Fear of Falling in Patients with De Novo Parkinson's Disease
Source: PubMed Central journal article supplement — J Clin Neurol. 2019 Aug 23;15(4):473–9. doi: 10.3988/jcn.2019.15.4.473 (PMC6785475; doi:10.3988/jcn.2019.15.4.473), 2019-08-23
Supplement: jcn-15-473-s002.pdf [file jcn-15-473-s002.pdf]

**Supplementary Table 2.** Spatiotemporal parameters of the three gait tasks in patients with *de novo* PD

|                         | <i>De novo</i> patients with PD |              |              | F      | p       | FG vs. BG | FG vs. DG | BG vs. DG |
|-------------------------|---------------------------------|--------------|--------------|--------|---------|-----------|-----------|-----------|
|                         | FG                              | BG           | DG           |        |         | p         | p         | p         |
| Walking speed, cm/s     | 107.72±14.48                    | 66.76±18.80  | 86.73±14.90  | 38.452 | <0.001* | <0.001*   | <0.001*   | <0.001*   |
| Cadence, steps/min      | 114.35±6.17                     | 111.31±13.54 | 103.53±12.94 | 5.762  | 0.005*  | 0.196     | <0.001*   | 0.022*    |
| Stride time, s          | 1.05±0.05                       | 1.09±0.13    | 1.17±0.16    | 5.861  | 0.004*  | 0.066     | 0.001*    | 0.045*    |
| Stride length, cm       | 113.35±14.19                    | 72.56±18.88  | 101.15±14.42 | 41.207 | <0.001* | <0.001*   | <0.001*   | <0.001*   |
| Swing phase, %          | 37.74±1.38                      | 34.78±3.00   | 36.20±1.79   | 11.187 | <0.001* | <0.001*   | <0.001*   | 0.014*    |
| Double-support phase, % | 24.45±2.87                      | 30.70±5.01   | 28.15±3.58   | 15.433 | <0.001* | <0.001*   | <0.001*   | 0.004*    |
| Step width, cm          | 7.53±2.05                       | 15.50±3.43   | 8.02±2.16    | 69.820 | <0.001* | <0.001*   | 0.012*    | <0.001*   |
| CV, %                   |                                 |              |              |        |         |           |           |           |
| Stride time             | 3.11±0.99                       | 6.18±2.61    | 5.72±3.05    | 11.490 | <0.001* | <0.001*   | <0.001*   | 0.516     |
| Stride length           | 3.88±1.68                       | 10.45±3.00   | 6.06±2.15    | 49.187 | <0.001* | <0.001*   | <0.001*   | <0.001*   |
| Asymmetry of gait       |                                 |              |              |        |         |           |           |           |
| Gait asymmetry index    | 3.36±2.59                       | 5.22±4.31    | 4.38±3.62    | 0.565  | 0.671   | 0.875     | 0.051     | 0.231     |
| Gait CV asymmetry       | 24.48±24.93                     | 17.99±15.22  | 22.36±16.92  | 0.066  | 0.939   | 0.765     | 0.931     | 0.786     |

Data are mean±SD values. ANOVA was used for comparisons of the three gait tasks, and the paired t-test was used for comparisons of two gait tasks in PD patients.

\*p<0.05.

BG: backward gait, CV: coefficient of variation, DG: dual-task gait, FG: forward gait, PD: Parkinson's disease.
